# Supplementary material
Source: HighWire-hosted journal article supplement (https://care.diabetesjournals.org/content/suppl/2005/04/27/28.5.1068)
Supplement: OnlineAppendixPg1068SupplementalFigureLegendsAndTables.pdf [file OnlineAppendixPg1068SupplementalFigureLegendsAndTables.pdf]

Supplemental Figure 1. Distribution of ages of randomized subjects in the oral insulin and placebo groups.

Supplemental Figure 2. Kaplan-Meier curves showing the proportion of subjects during the trial, by treatment assignment, who remained

(A) without “suspected” (unconfirmed) diabetes.

(B) without any abnormal glucose tolerance test.

(C) without loss of first phase insulin response (FPIR).

The number of subjects at risk in each group at each year of follow-up is enumerated at the bottom of the figure. The log rank test was used for comparison between the groups, with the P-values as indicated.

Supplemental Figure 3. Mean area under the curve for C-peptide response during oral glucose tolerance tests during the trial, by treatment assignment.

Supplemental Figure 4. Kaplan-Meier curves showing the proportion of subjects without diabetes during the trial by treatment assignment for subjects with baseline IAA with at least one value 39-79 nU/ml.

The number of subjects at risk in each group at each year of follow-up is enumerated at the bottom of the figure. The log rank test was used for comparison between the groups, with the P-values as indicated.

Supplemental Table 1.

Baseline characteristics of randomized subjects with confirmed IAA  $\geq$  80

|                                                 | Oral insulin group | Placebo group | p-value |
|-------------------------------------------------|--------------------|---------------|---------|
| N                                               | 130                | 133           |         |
| Median age (interquartile range)                | 10.0 (6,13)        | 9.0 (6,12)    | 0.1258  |
| Average FPIR ( $\mu$ U/ml) (standard deviation) | 155.4 (71.6)       | 155.1 (107.6) | 0.9764  |
| Race                                            |                    |               | 0.3773  |
| White                                           | 112 (86.1%)        | 119 (89.7%)   |         |
| African American                                | 4 (3.0%)           | 1 (0.7%)      |         |
| Hispanic                                        | 7 (5.3%)           | 8 (6.0%)      |         |
| Other                                           | 7 (5.3%)           | 5 (3.7%)      |         |
| Gender                                          |                    |               | 0.0304  |
| Male                                            | 91 (70.0%)         | 76 (57.1%)    |         |
| Female                                          | 39 (30.0%)         | 57 (42.8%)    |         |
| Relationship to index patient with diabetes     |                    |               | 0.7136  |
| Sibling                                         | 81 (62.3%)         | 81 (60.9%)    |         |
| Offspring                                       | 33 (25.3%)         | 38 (28.5%)    |         |
| Parent                                          | 6 (4.6%)           | 3 (2.2%)      |         |
| 2 <sup>nd</sup> Degree                          | 10 (7.6%)          | 11 (8.2%)     |         |
| Antibody levels                                 |                    |               |         |
| Median ICA (JDF units) (interquartile range)    | 80 (40,320)        | 80 (40,320)   | 0.8770  |
| Mean IAA (nU/ml) (standard deviation)           | 518.4 (615.5)      | 452.7 (471.8) | 0.3319  |
| GAD Antibodies                                  |                    |               | 0.7251  |
| Positive                                        | 103 (79.2%)        | 103 (77.4%)   |         |
| Negative                                        | 27 (20.7%)         | 30 (22.5%)    |         |
| ICA-512 Antibodies                              |                    |               | 0.9713  |
| Positive                                        | 74 (56.9%)         | 76 (57.1%)    |         |
| Negative                                        | 56 (43.0%)         | 57 (42.8%)    |         |
| MIAA Antibodies                                 |                    |               | 0.0858  |
| Positive                                        | 36 (37.8%)         | 27 (26.4%)    |         |
| Negative                                        | 59 (62.1%)         | 75 (73.5%)    |         |
| HbA1c (%) (standard deviation)                  | 5.37 (0.38)        | 5.33 (0.34)   | 0.3402  |
| C-Peptide Area Under Curve                      |                    |               |         |
| During Intravenous Glucose Tolerance Test       | 32.7 (14.2)        | 33.0 (16.6)   | 0.8747  |
| During Oral Glucose Tolerance Test              | 470.1 (181.6)      | 483.0 (196.6) | 0.5835  |
| During Mixed Meal Tolerance Test                | 354.2 (152.4)      | 358.1 (185.3) | 0.8543  |

Supplemental Table 2.

Baseline characteristics of randomized subjects not confirmed to have IAA  $\geq 80$ 

|                                                 | Oral insulin group | Placebo group | p-value |
|-------------------------------------------------|--------------------|---------------|---------|
| N                                               | 56                 | 53            |         |
| Median age (interquartile range)                | 13.0 (9,18)        | 14.0 (9,19)   | 0.5239  |
| Average FPIR ( $\mu$ U/ml) (standard deviation) | 175.7 (72.9)       | 168..4 (73.8) | 0.6008  |
| Race                                            |                    |               | 0.1452  |
| White                                           | 52 (92.8%)         | 44 (83.0%)    |         |
| African American                                | 1 (1.7%)           | 1 (1.8%)      |         |
| Hispanic                                        | 1 (1.7%)           | 6 (11.3%)     |         |
| Other                                           | 2 (3.4%)           | 2 (3.6%)      |         |
| Gender                                          |                    |               | 0.6222  |
| Male                                            | 28 (50.0%)         | 29 (54.7%)    |         |
| Female                                          | 28 (50.0%)         | 24 (45.2%)    |         |
| Relationship to index patient with diabetes     |                    |               | 0.7759  |
| Sibling                                         | 31 (55.3%)         | 27 (50.9%)    |         |
| Offspring                                       | 16 (28.5%)         | 15 (28.3%)    |         |
| Parent                                          | 5 (8.9%)           | 4 (7.5%)      |         |
| 2 <sup>nd</sup> Degree                          | 4 (7.1%)           | 7 (13.2%)     |         |
| Antibody levels                                 |                    |               |         |
| Median ICA (JDF units) (interquartile range)    | 40 (20,160)        | 40 (20,160)   | 0.8442  |
| Mean IAA (nU/ml) (standard deviation)           | 65.3 (30.0)        | 79.2 (99.0)   | 0.3179  |
| GAD Antibodies                                  |                    |               | 0.1695  |
| Positive                                        | 41 (74.5%)         | 33 (62.2%)    |         |
| Negative                                        | 14 (25.4%)         | 20 (37.7%)    |         |
| ICA-512 Antibodies                              |                    |               | 0.8164  |
| Positive                                        | 23 (41.8%)         | 21 (39.6%)    |         |
| Negative                                        | 32 (58.1%)         | 32 (60.3%)    |         |
| MIAA Antibodies                                 |                    |               | 0.3415  |
| Positive                                        | 3 (7.8%)           | 1 (2.3%)      |         |
| Negative                                        | 35 (92.1%)         | 41 (97.6%)    |         |
| HbA1c (%) (standard deviation)                  | 5.31 (0.41)        | 5.35 (0.34)   | 0.6486  |
| C-Peptide Area Under Curve                      |                    |               |         |
| During Intravenous Glucose Tolerance Test       | 39.8 (17.6)        | 40.5 (15.9)   | 0.8277  |
| During Oral Glucose Tolerance Test              | 577.0 (224.7)      | 550.1 (226.7) | 0.5352  |
| During Mixed Meal Tolerance Test                | 448.8 (197.3)      | 437.3 (169.0) | 0.7465  |

Supplemental Table 3.  
Baseline characteristics of subjects randomized before October 31, 1997

|                                                 | Oral insulin group | Placebo group | p-value |
|-------------------------------------------------|--------------------|---------------|---------|
| N                                               | 54                 | 52            |         |
| Median age (interquartile range)                | 11.0 (7,14)        | 9.5 (6,13)    | 0.1258  |
| Average FPIR ( $\mu$ U/ml) (standard deviation) | 151.7 (72.6)       | 136.8 (61.0)  | 0.2547  |
| Race                                            |                    |               | 0.0796  |
| White                                           | 48 (88.8%)         | 46 (88.4%)    |         |
| African American                                | 2 (3.7%)           | 0 (0.0%)      |         |
| Hispanic                                        | 0 (0.0%)           | 4 (7.6%)      |         |
| Other                                           | 4 (7.3%)           | 2 (3.8%)      |         |
| Gender                                          |                    |               | 0.1781  |
| Male                                            | 35 (64.8%)         | 27 (51.9%)    |         |
| Female                                          | 19 (35.1%)         | 25 (48.0%)    |         |
| Relationship to index patient with diabetes     |                    |               | 0.6186  |
| Sibling                                         | 34 (62.9%)         | 35 (67.3%)    |         |
| Offspring                                       | 15 (27.7%)         | 12 (23.0%)    |         |
| Parent                                          | 3 (5.5%)           | 1 (1.9%)      |         |
| 2 <sup>nd</sup> Degree                          | 2 (3.7%)           | 4 (7.6%)      |         |
| Antibody levels                                 |                    |               |         |
| Median ICA (JDF units) (interquartile range)    | 120 (40,320)       | 160 (40,320)  | 0.5986  |
| Mean IAA (nU/ml) (standard deviation)           | 408.3 (419.0)      | 476.3 (510.0) | 0.4541  |
| GAD Antibodies                                  |                    |               | 0.5739  |
| Positive                                        | 42 (77.7%)         | 48 (73.0%)    |         |
| Negative                                        | 12 (22.2%)         | 14 (26.9%)    |         |
| ICA-512 Antibodies                              |                    |               | 0.3331  |
| Positive                                        | 24 (44.4%)         | 28 (53.8%)    |         |
| Negative                                        | 30 (55.5%)         | 24 (46.1%)    |         |
| MIAA Antibodies                                 |                    |               | 0.4013  |
| Positive                                        | 11 (37.9%)         | 8 (27.5%)     |         |
| Negative                                        | 18 (62.0%)         | 21 (72.4%)    |         |
| HbA1c (%) (standard deviation)                  | 5.38 (0.40)        | 5.29 (0.37)   | 0.2586  |
| C-Peptide Area Under Curve                      |                    |               |         |
| During Intravenous Glucose Tolerance Test       | 32.1 (13.4)        | 29.9 (12.9)   | 0.3989  |
| During Oral Glucose Tolerance Test              | 473.1 (175.0)      | 470.5 (186.9) | 0.9189  |
| During Mixed Meal Tolerance Test                | 373.8 (171.0)      | 346.9 (188.7) | 0.4480  |
