# Supplementary material
Source: HighWire-hosted journal article supplement (https://care.diabetesjournals.org/content/suppl/2005/04/27/28.5.1068)

Supplemental Figure 1

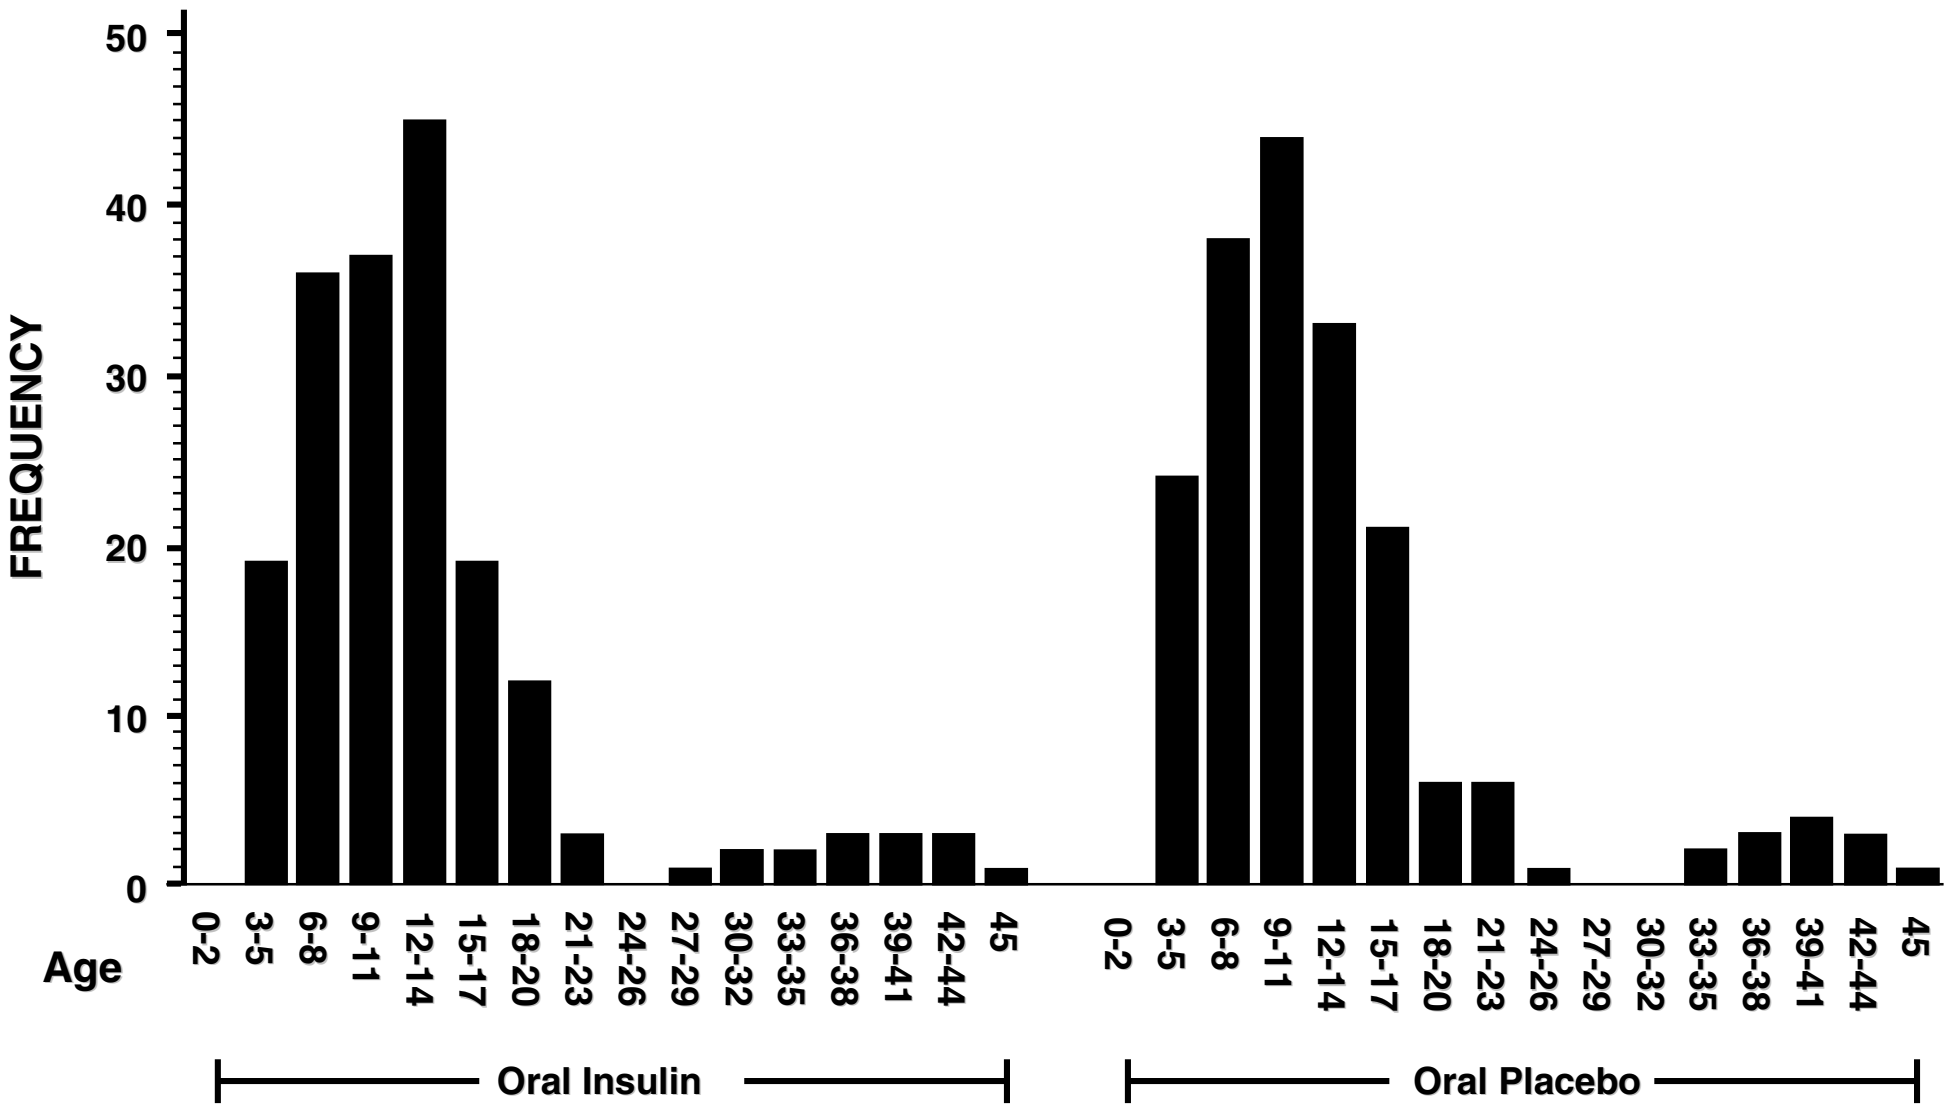

Supplemental Figure 2A

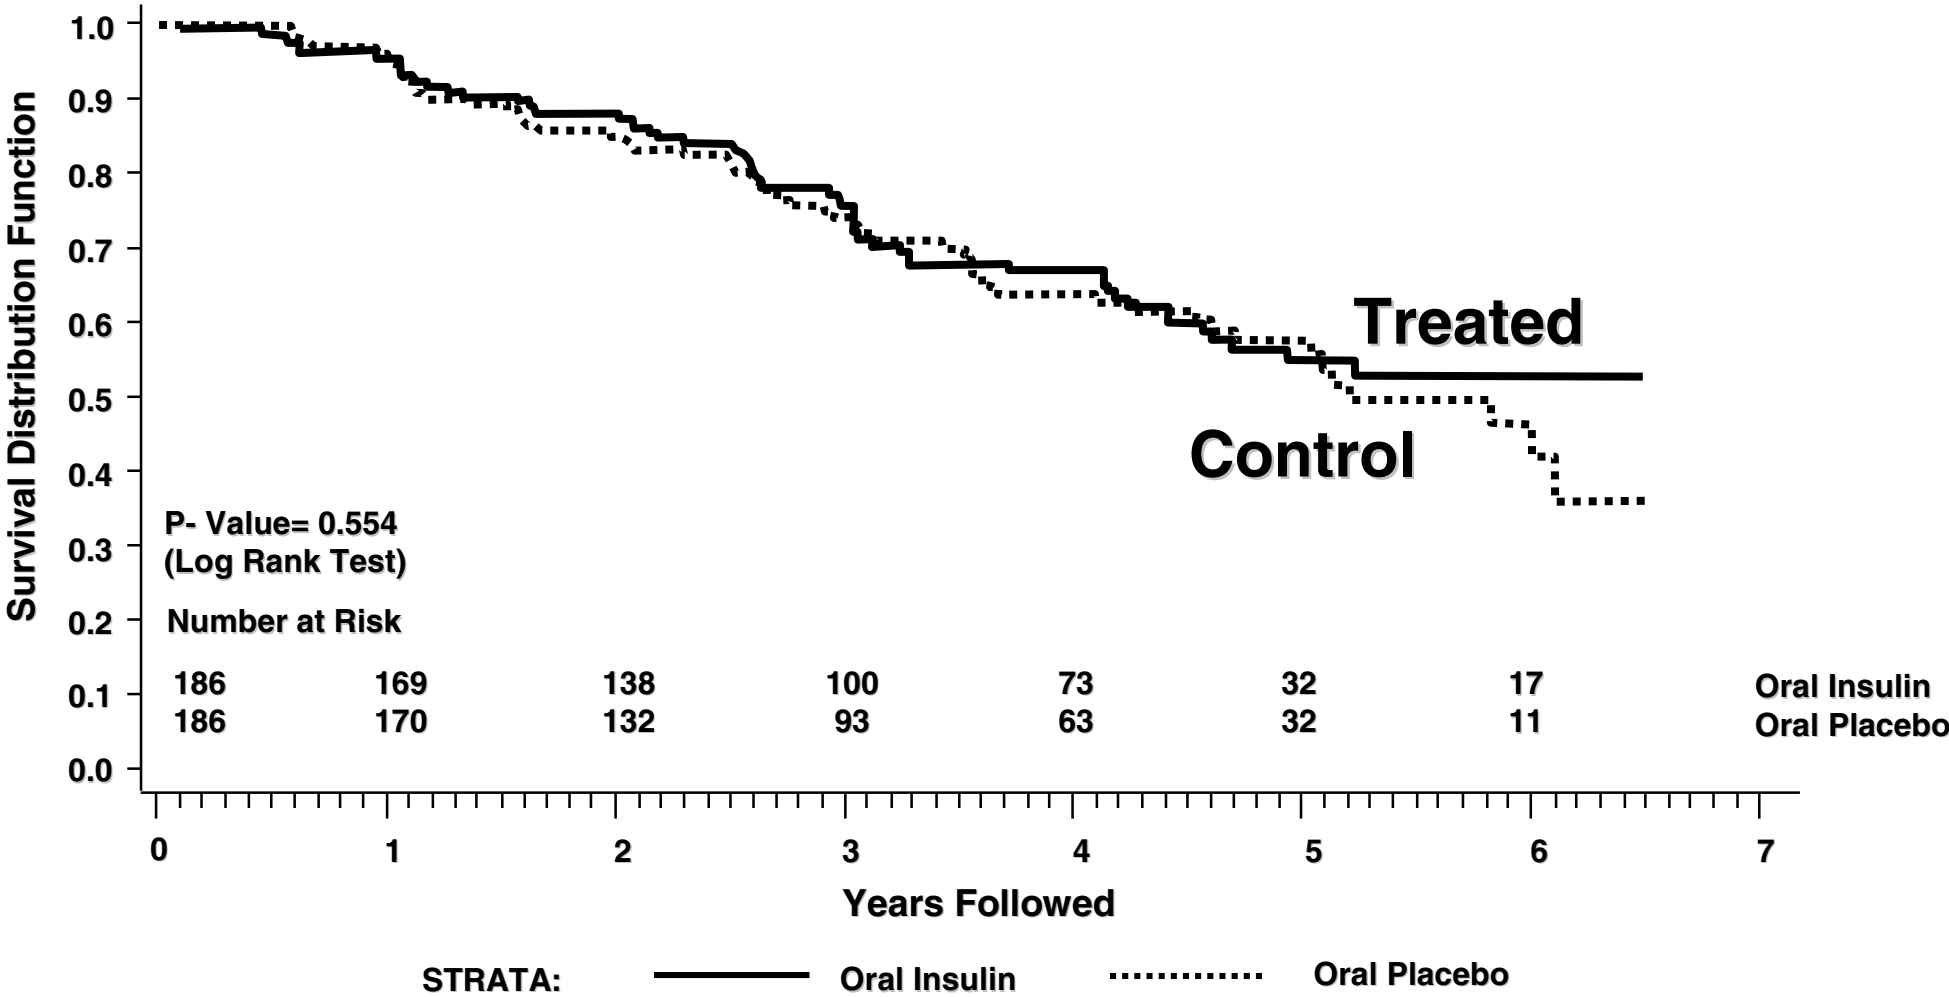

# Supplemental Figure 2B

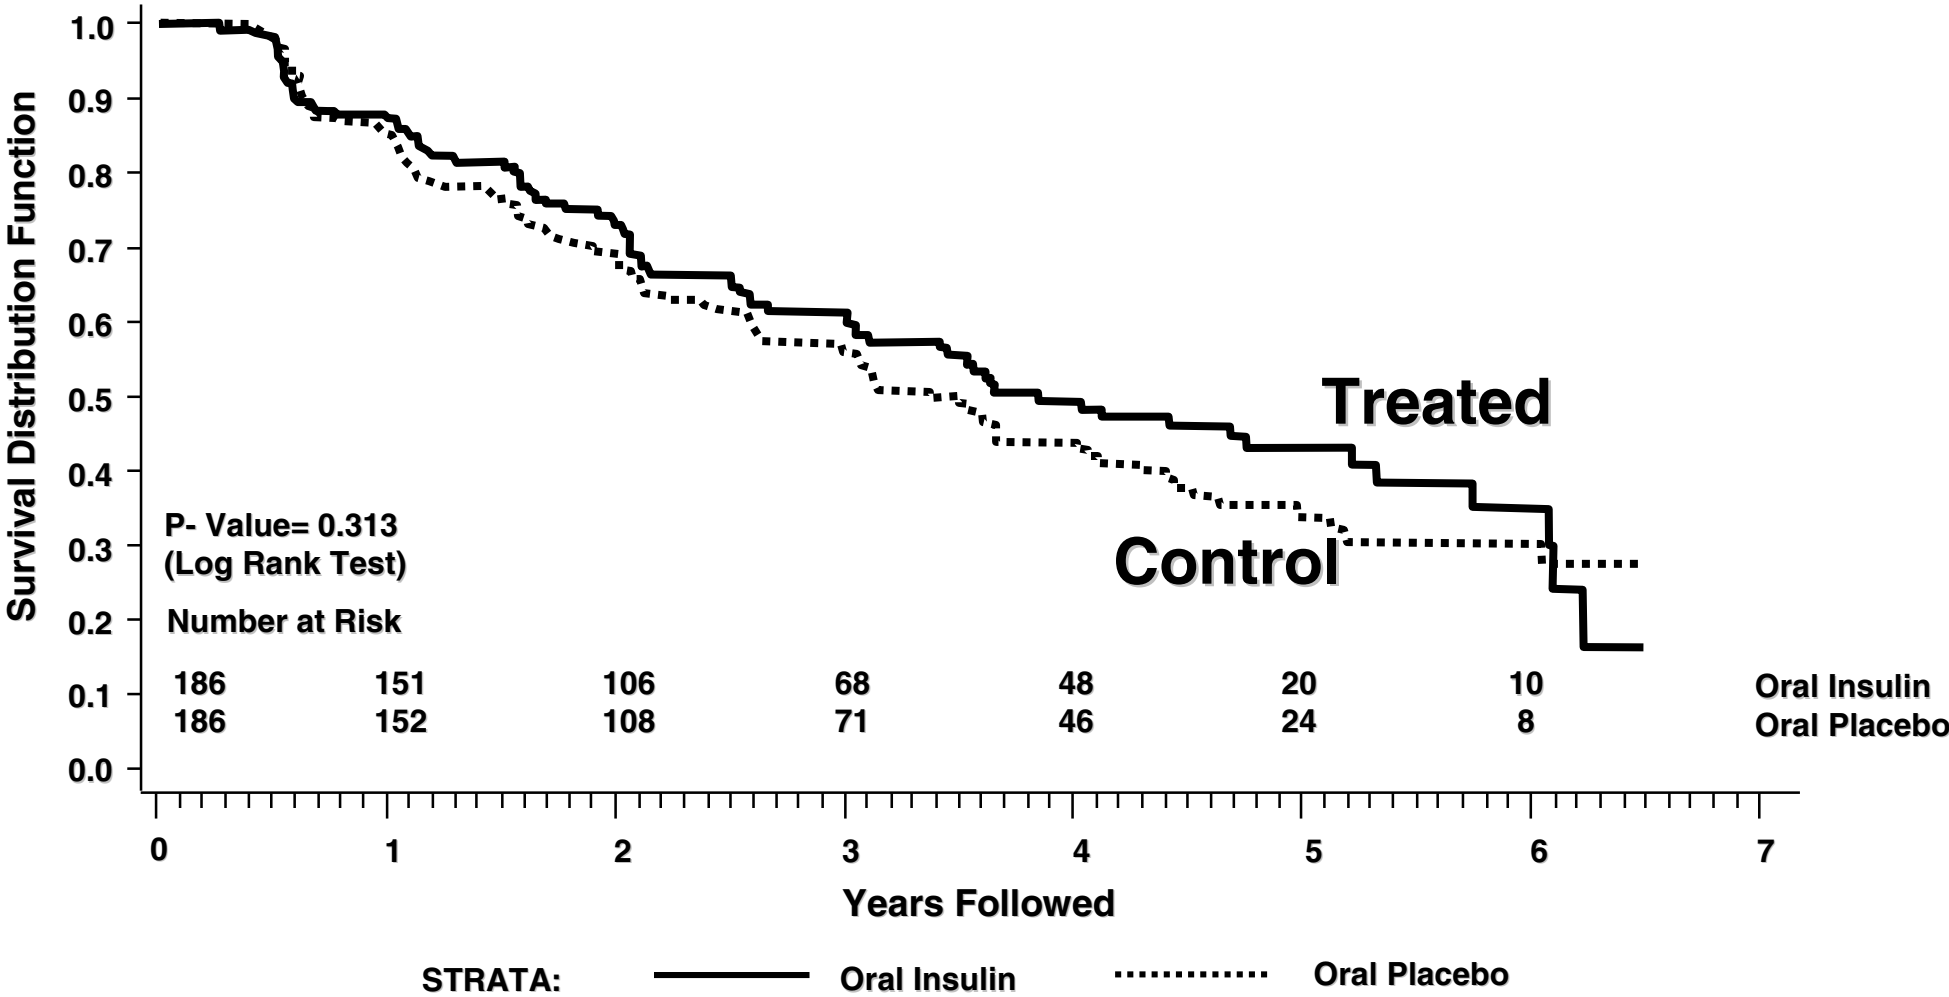

Supplemental Figure 2C

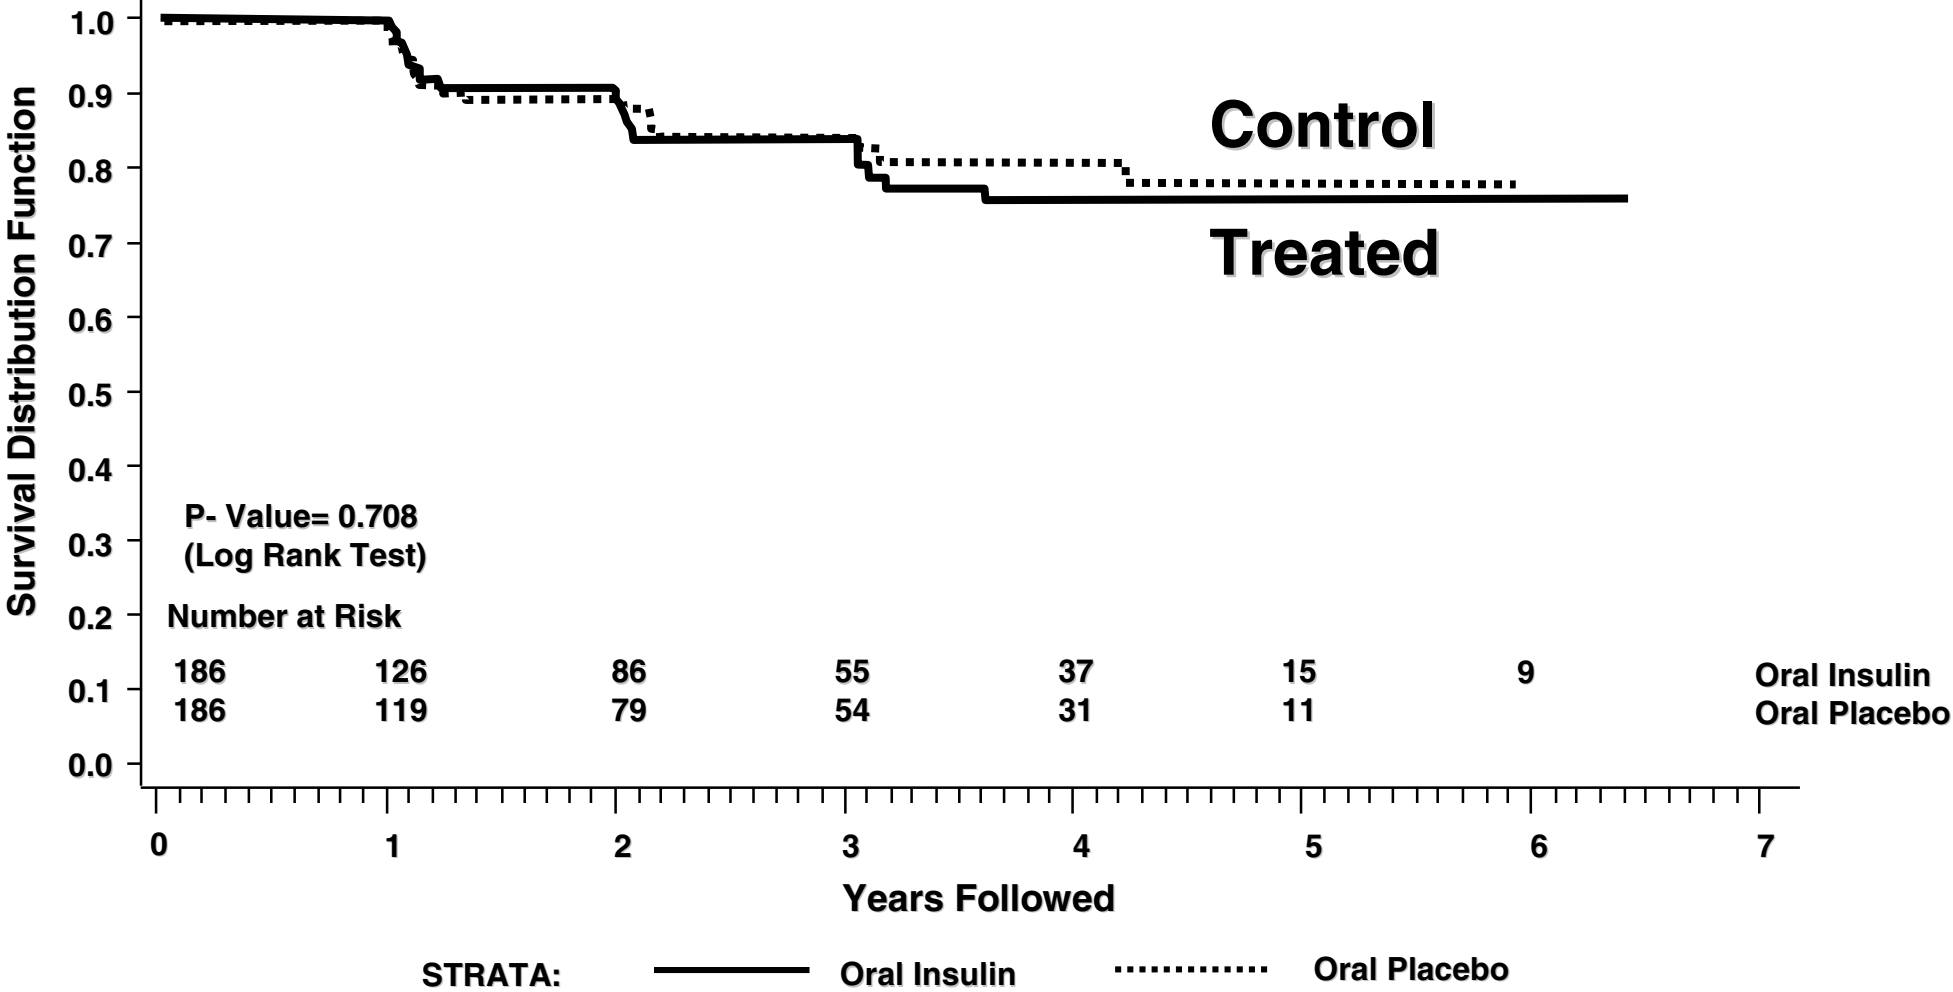

# Supplemental Figure 3

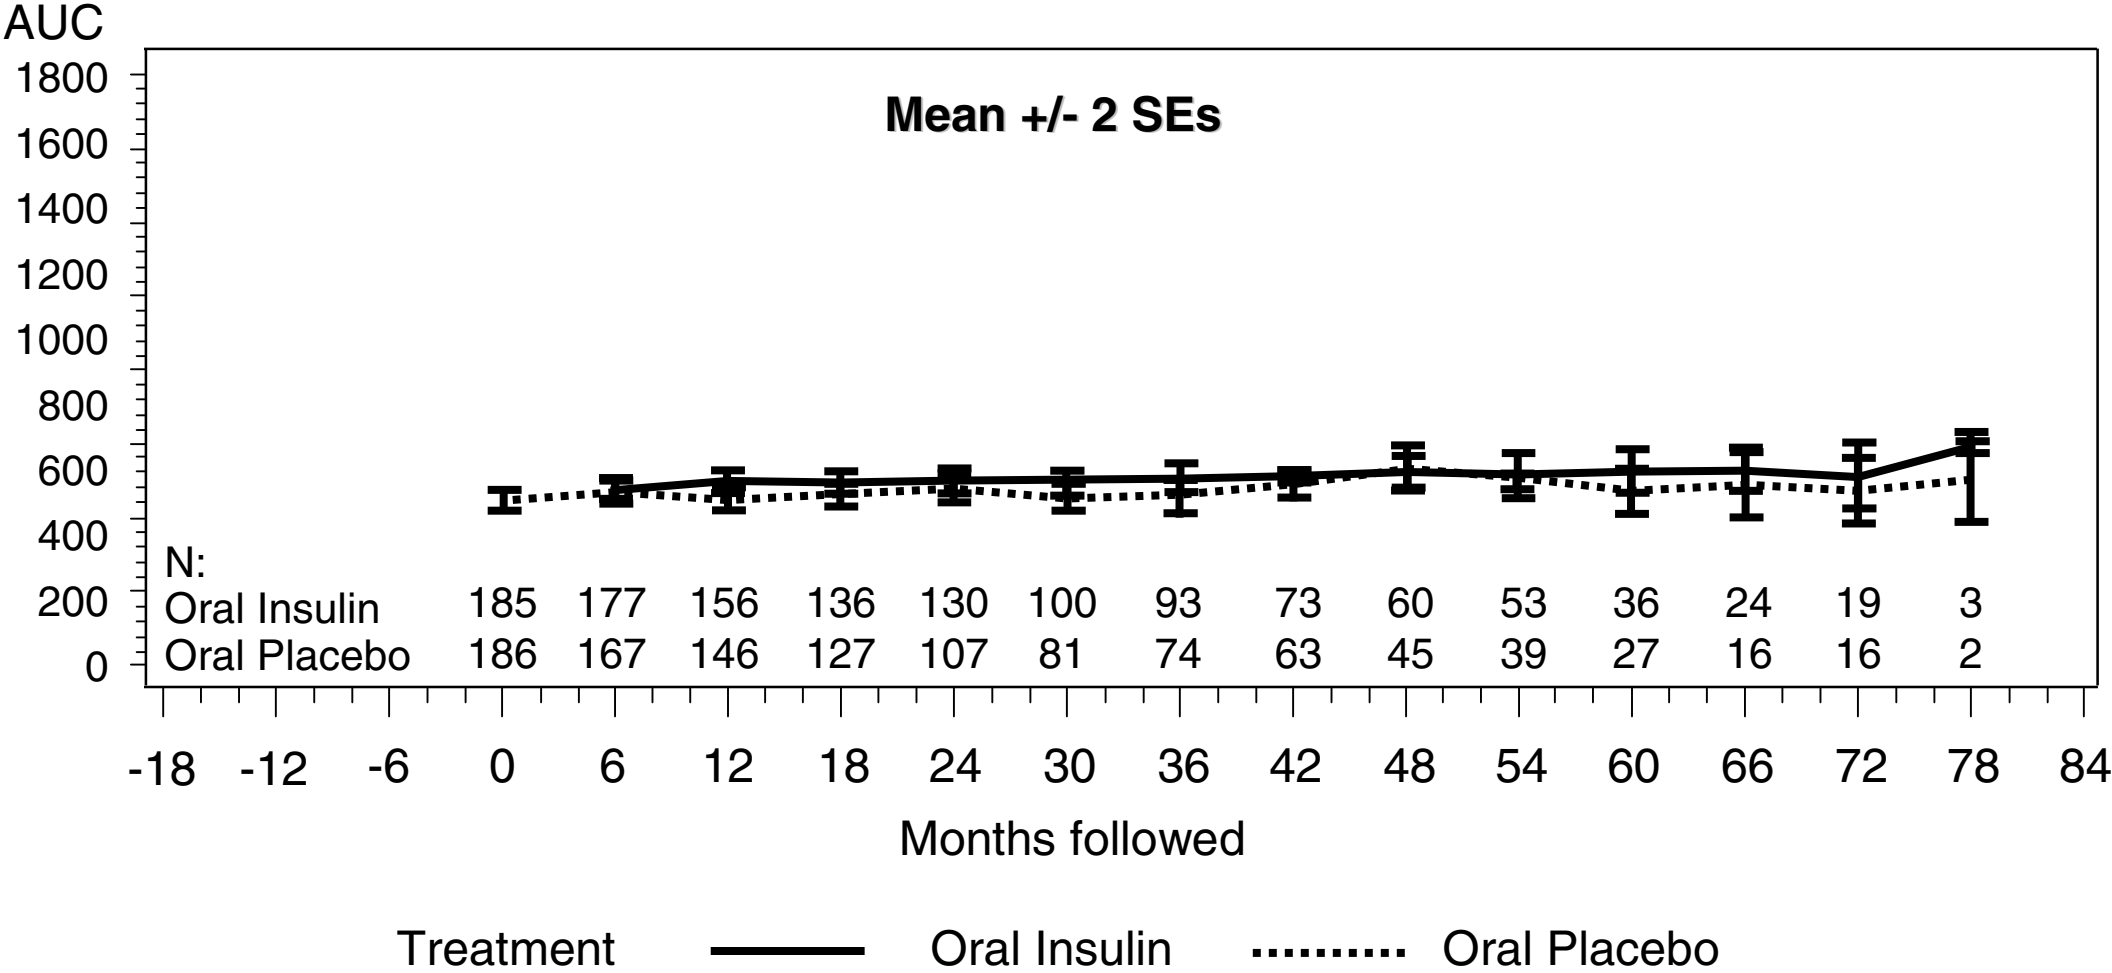

# Supplemental Figure 4

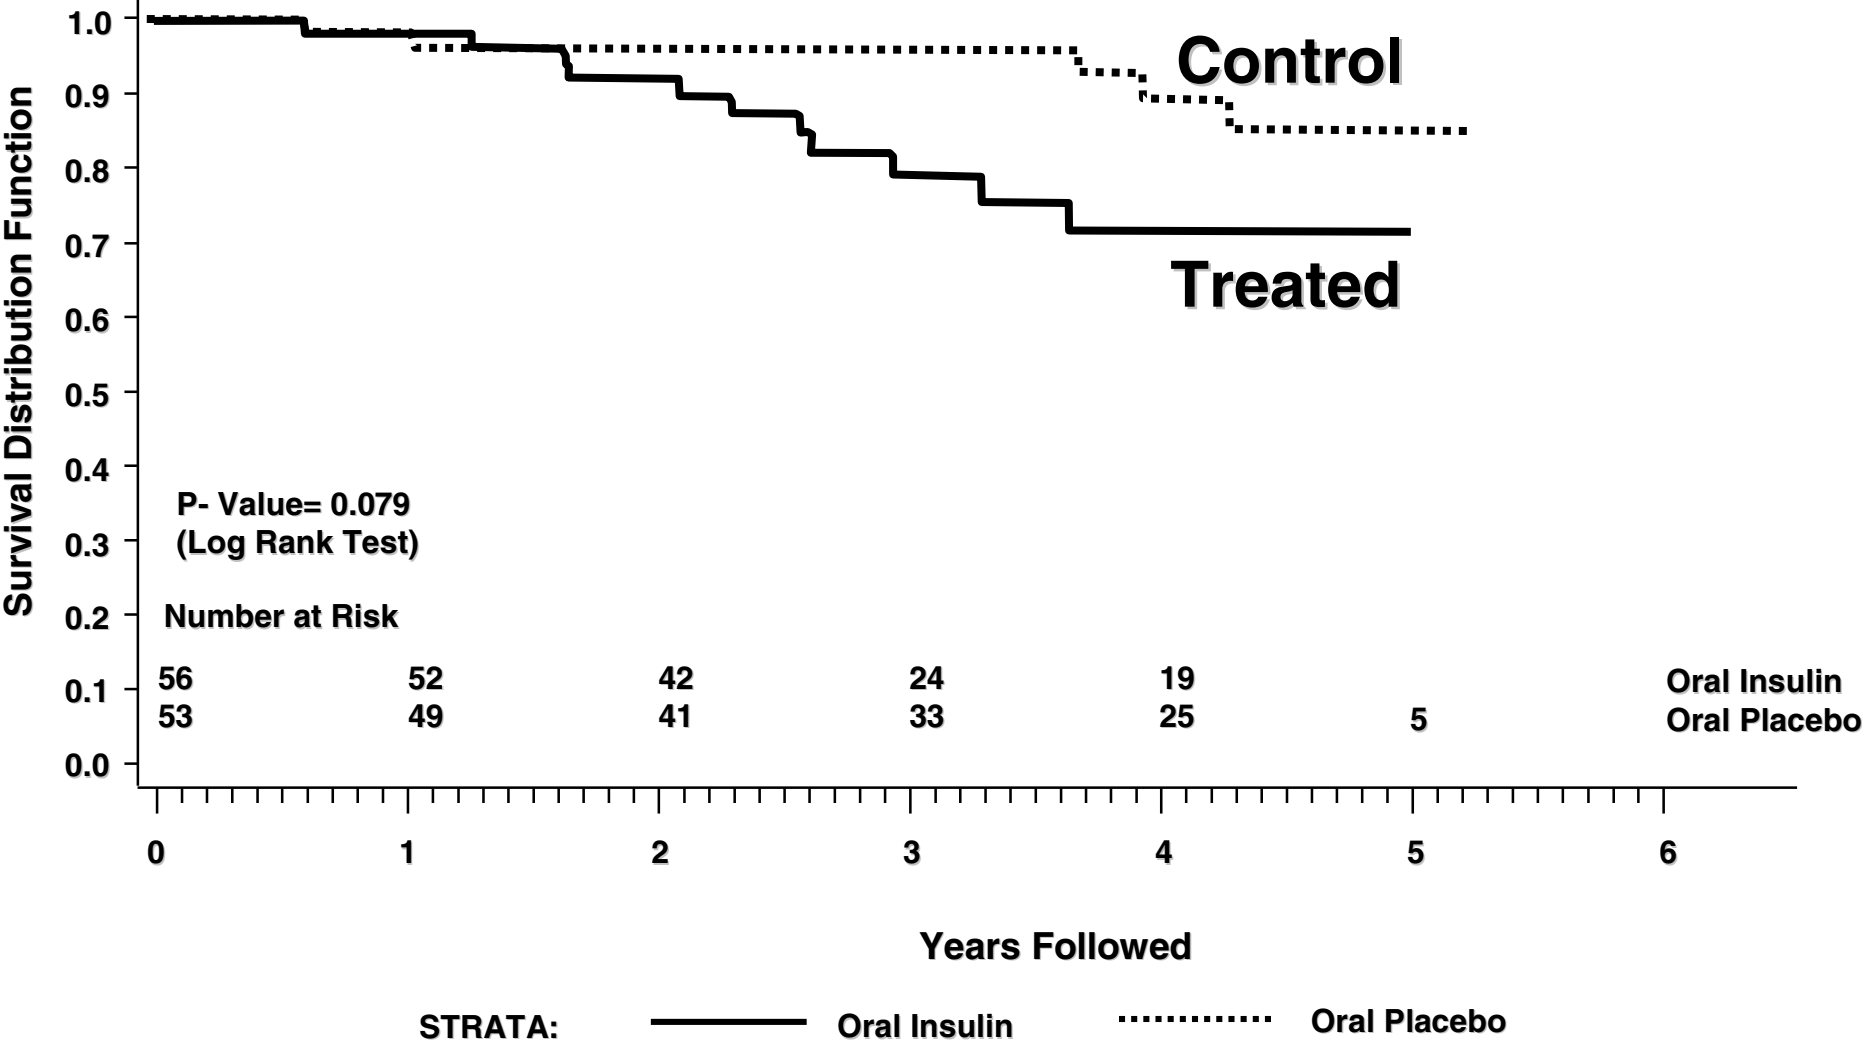

Supplement: OnlineAppendixPg1068SupplFigs1234.pdf [file OnlineAppendixPg1068SupplFigs1234.pdf]
